# Supplementary material for: Non-coding RNA Expression, Function, and Variation during Drosophila Embryogenesis
Source: PubMed Central journal article supplement (PMC6264527; doi:10.1016/j.cub.2018.09.026), 2018-11-19
Supplement: mmc1.pdf [file mmc1.pdf]

Current Biology, Volume 28

## Supplemental Information

### Non-coding RNA Expression, Function, and Variation during *Drosophila* Embryogenesis

Ignacio E. Schor, Giovanni Bussotti, Matilda Maleš, Mattia Forneris, Rebecca R. Viales, Anton J. Enright, and Eileen E.M. Furlong

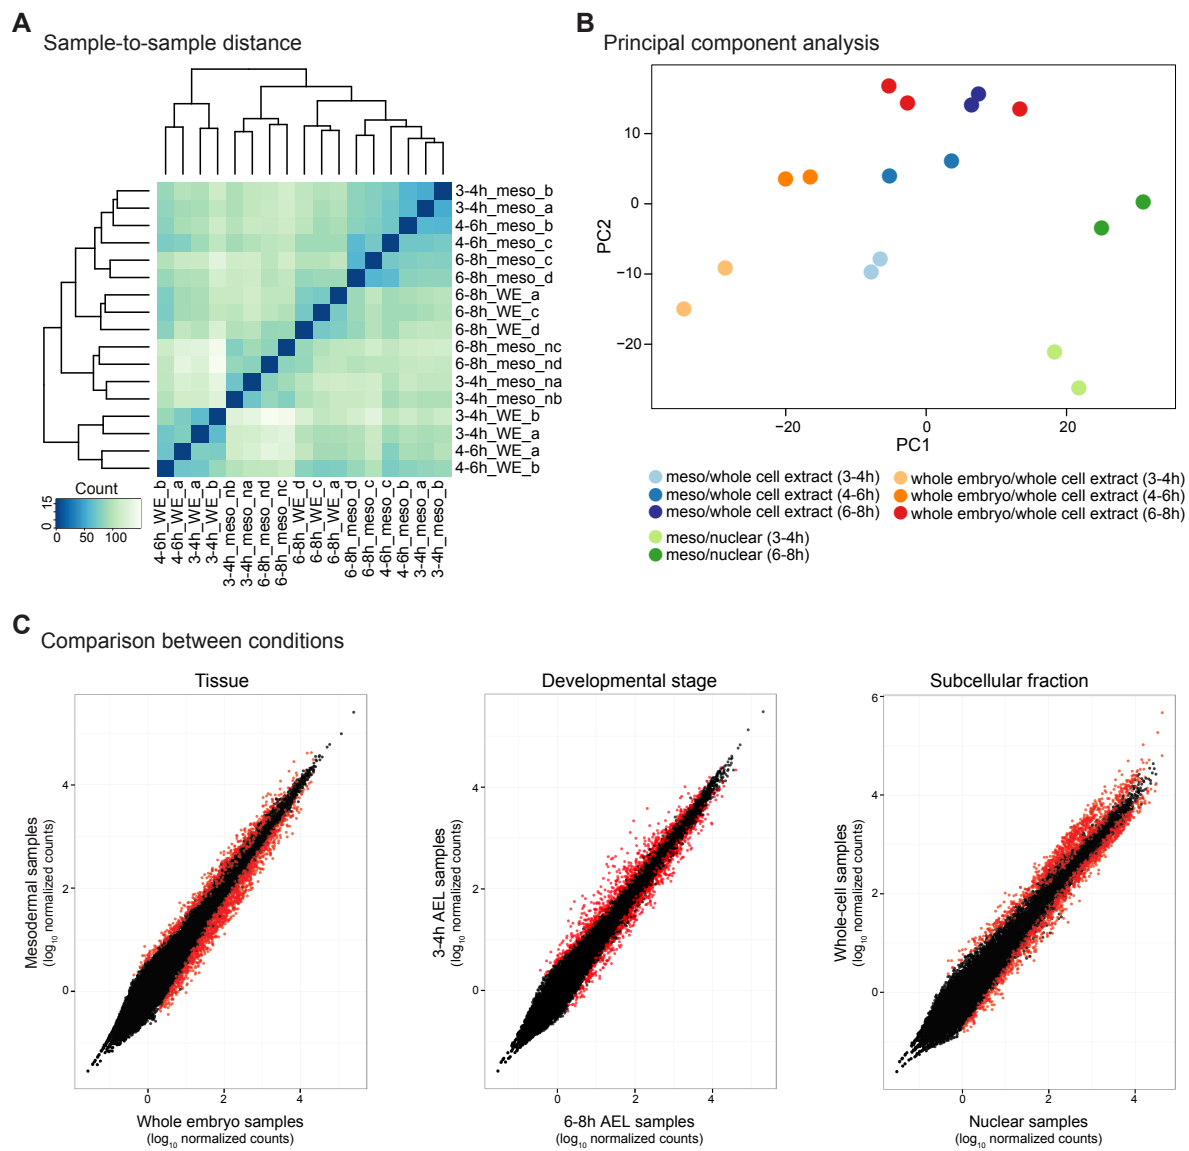

**Figure S1. Differential expression analysis. Related to STAR Methods**

(A) Matrix of pairwise distances between all samples included in the DE analysis. (B) Principal component analysis. S = FACS sorted (mesoderm), U= unsorted (whole embryo), yes = nuclear enrichment, no = whole cell extract. Replicates group together. Samples tend to group closer by developmental time point, then by tissue or nuclear fraction (e.g. all 3-4hr samples are in the lower half). (C) BaseMean counts ( $\log_{10}$  scale) as estimated by DESeq2 comparing between: (*left*) tissue (mesoderm vs whole embryo), (*middle*) developmental stage, (*right*) nuclear fraction versus whole cell. BaseMean is the mean of normalized counts of all samples of that condition, normalizing for sequencing depth. For example, the middle panel reflects gene coverage at 3-4 vs 6-8 hours, averaging all 3-4h and 6-8h samples (i.e. including both WE and mesoderm samples). The right panel reflects gene coverage in nuclear enriched vs non-nuclear enriched samples, averaging all nuclear and non-nuclear samples (which are all mesoderm samples). Scatterplots show significant genes for the indicated contrasts. Red dots depict genes with adjusted  $p$ -value  $< 0.01$ .

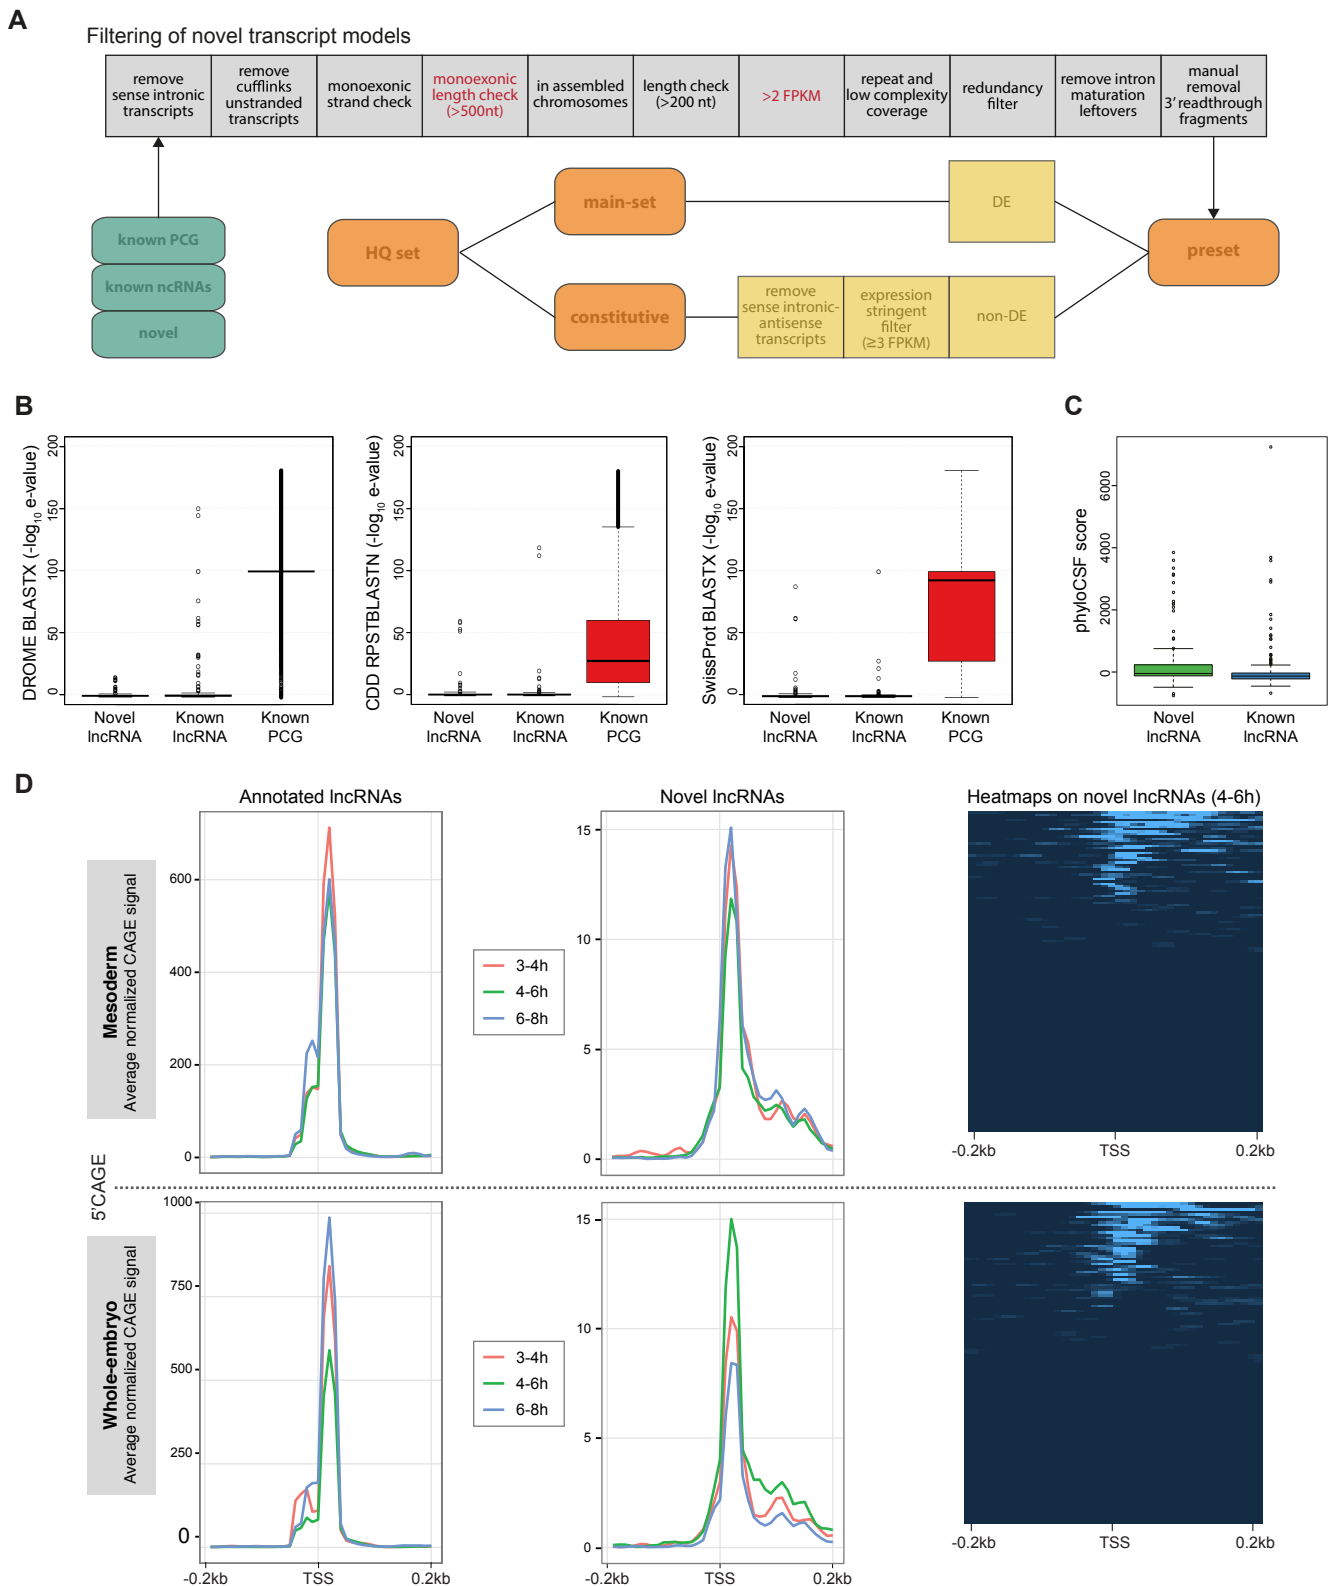

**Figure S2. Identification and validation of novel lncRNA genes. Related to Figure 1**

(A) Overview of transcript filtering to obtain a high-confidence set of new lncRNAs. The two most stringent filters, in terms of transcripts removed, are shown in red text. The filtered pre-set was divided into transcripts with (main-set) and without (constitutive) significant ( $p < 0.01$ ) differential expression across stage or tissue. The combination of these two results in our high-quality (HQ) set of novel lncRNAs used in the rest of the analysis. (B) Boxplots showing the e-values of the three transcript sets (novel and known lncRNA and PCGs) for the following BLAST searches: BLASTX against Drosophila proteome (DROME) and SwissProt; RPST BLASTN against the NCBI Conserved Domain Database (CDD). (C) PhyloCSF analysis for conservation of predicted ORFs found in the novel and annotated lncRNA sets. (D) 5'CAGE support of transcript start sites. Plots show average 5'CAGE signal for promoter regions of novel and annotated lncRNAs. Transcripts with promoter region overlapping other TSSs (in a window of 50nt on the same strand) were excluded. Heatmaps represent normalized CAGE signal for novel transcripts expressed at 4-6h in mesoderm and whole embryo.

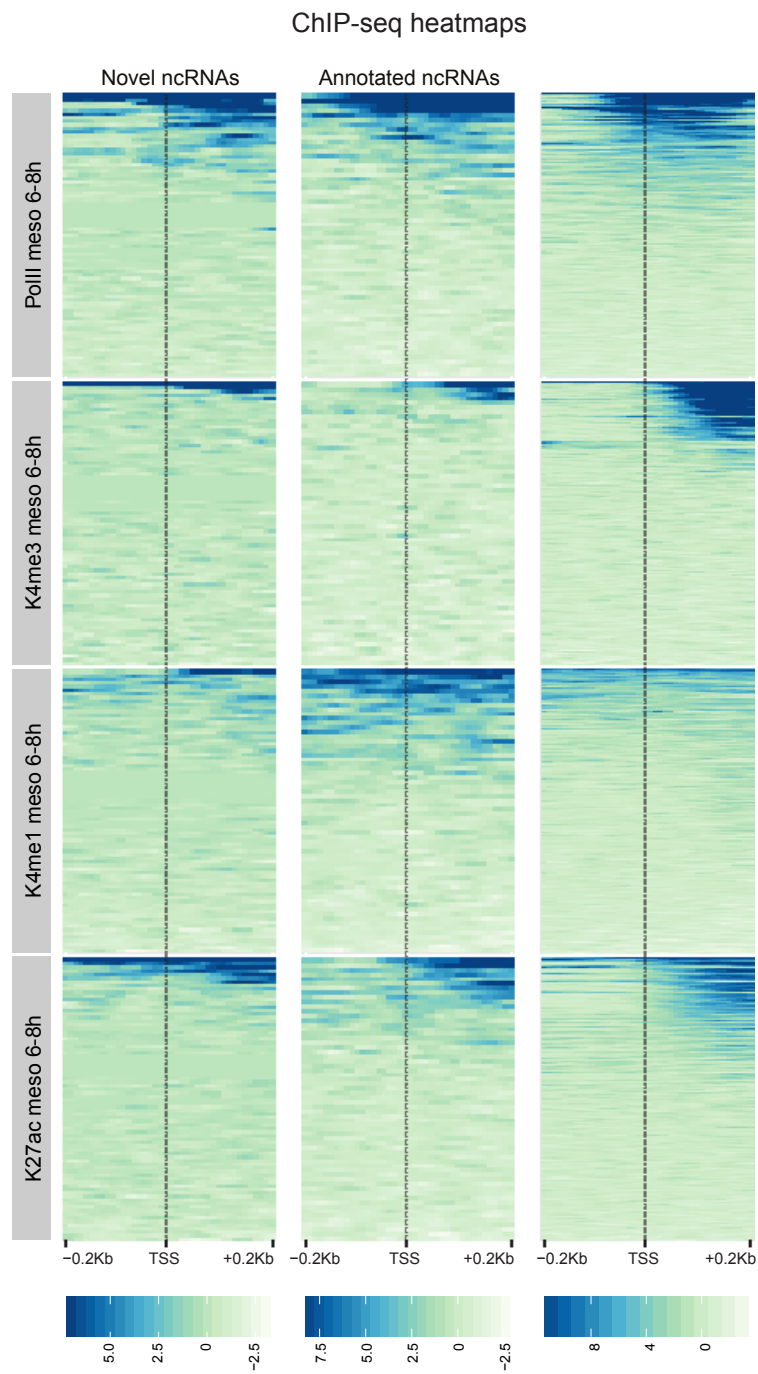

**Figure S3. RNA pol II and promoter associated chromatin marks are often not detected at lncRNA promoters. Related to Figure 1**  
 Shown are heatmaps of ChIP-seq signal for the indicated factors at novel lncRNA, annotated lncRNA and protein-coding gene promoters. Data corresponds to the average profile plots shown in Figure 1D.

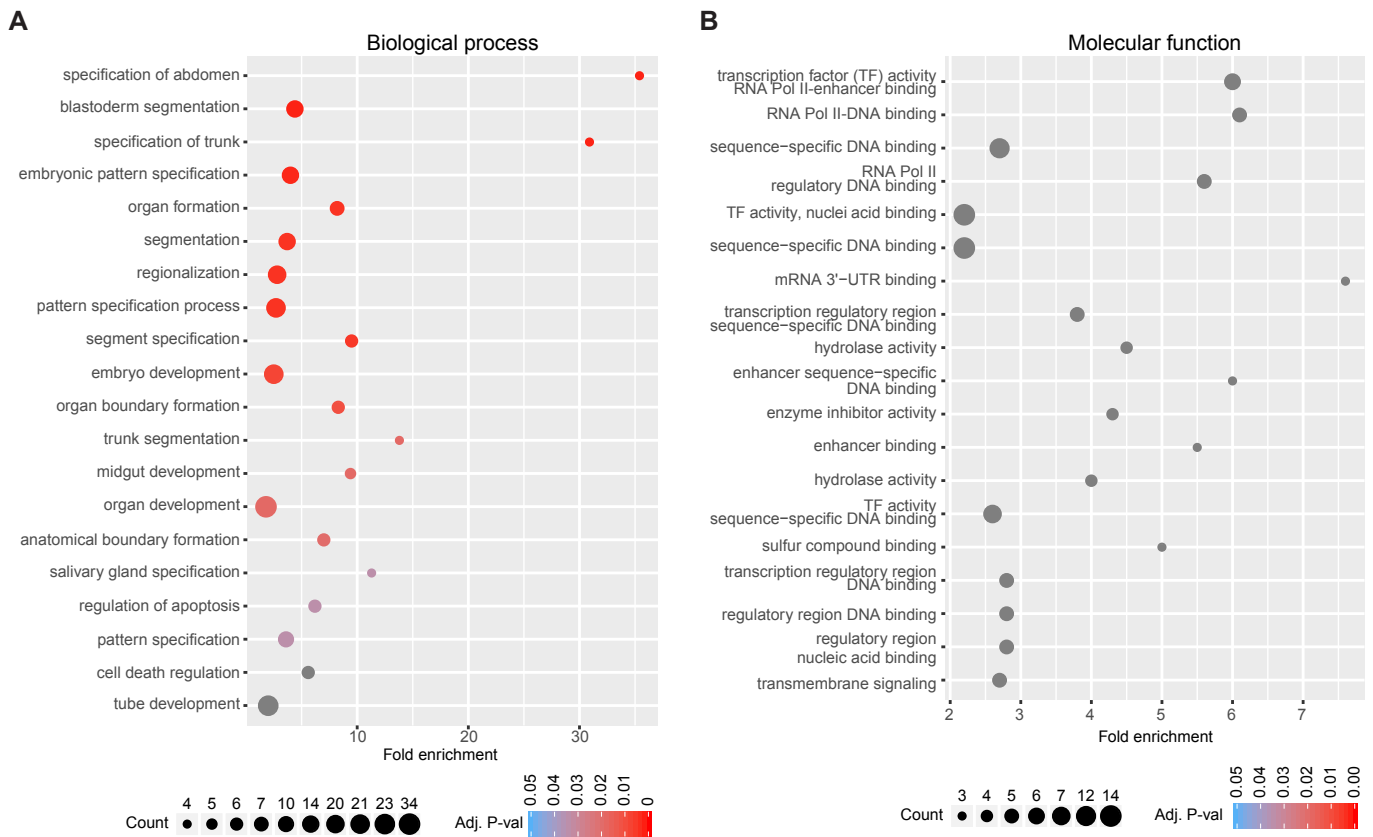

**Figure S4. Functional enrichment of nuclear lncRNA-associated genes. Related to Figure 2**

(A) GO term enrichment analysis of biological processes. (B) GO enrichment analysis of molecular functions. For each analysis, the first protein coding gene (PCG) neighbor at each side of the lncRNA was considered, while the entire high-quality set of PCGs expressed in our sample set was used as the reference. X-axis indicates fold enrichment between observed and expected GO terms, y-axis reports the significant biological process terms sorted by decreasing p-value. Dot size reflects the number of genes in that ontology, dot color indicates Benjamini-Hochberg adjusted p-values.

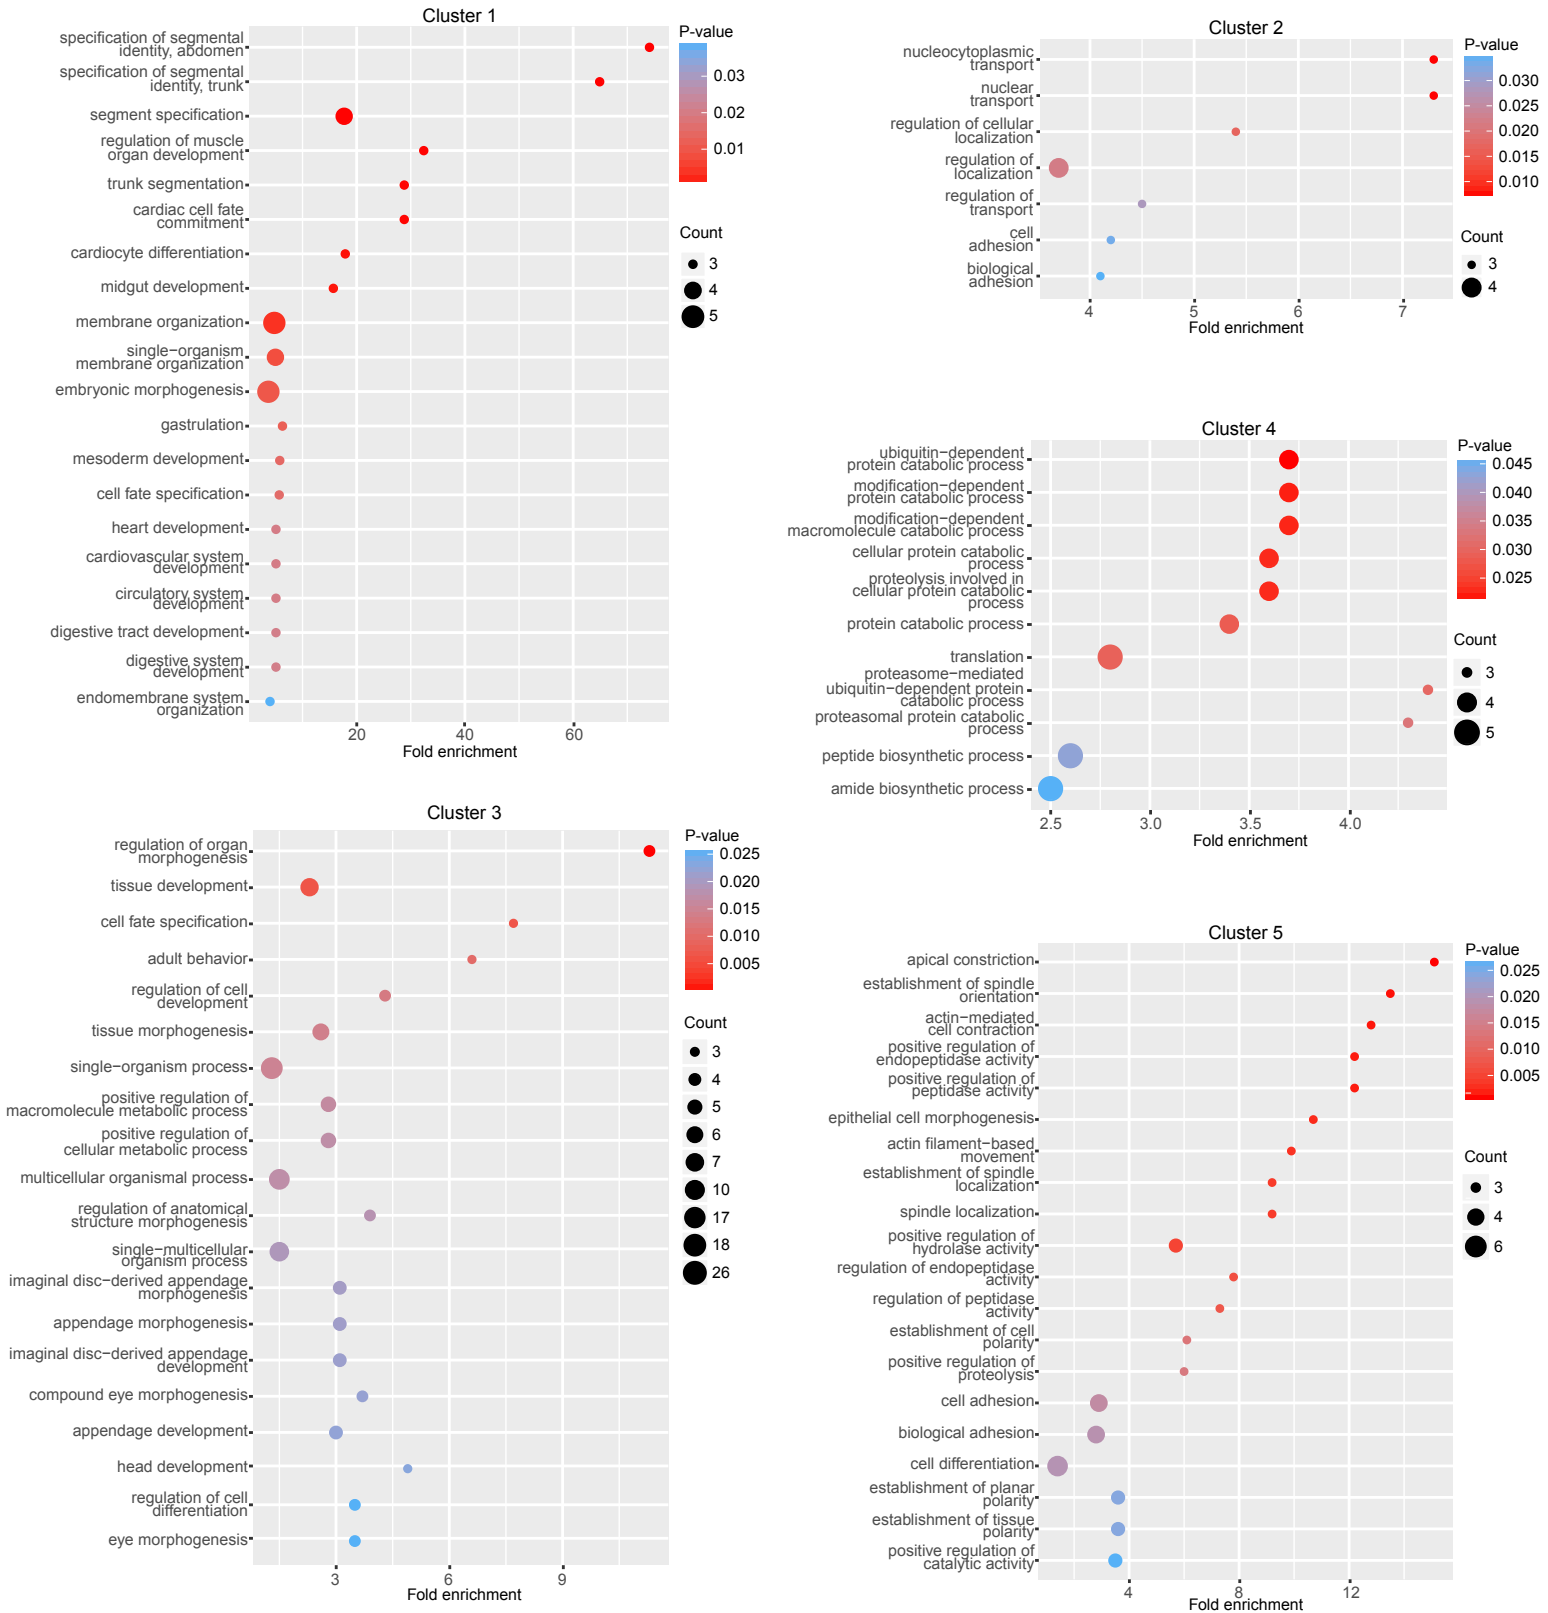

**Figure S5. GO term enrichment of genes in the vicinity of lncRNA gene clusters. Related to Figure 2** Enrichment analysis of GO terms (biological processes) for the two closest protein coding gene (PCG) neighbors of lncRNA genes belonging to clusters 1 to 5. The high-quality set of PCGs expressed in our sample set was used as the reference. X-axis indicates fold enrichment between observed and expected GO terms, y-axis reports the significant biological process terms sorted by decreasing p-value. Dot size reflects the number of genes in that ontology, dot color indicates raw p-values.

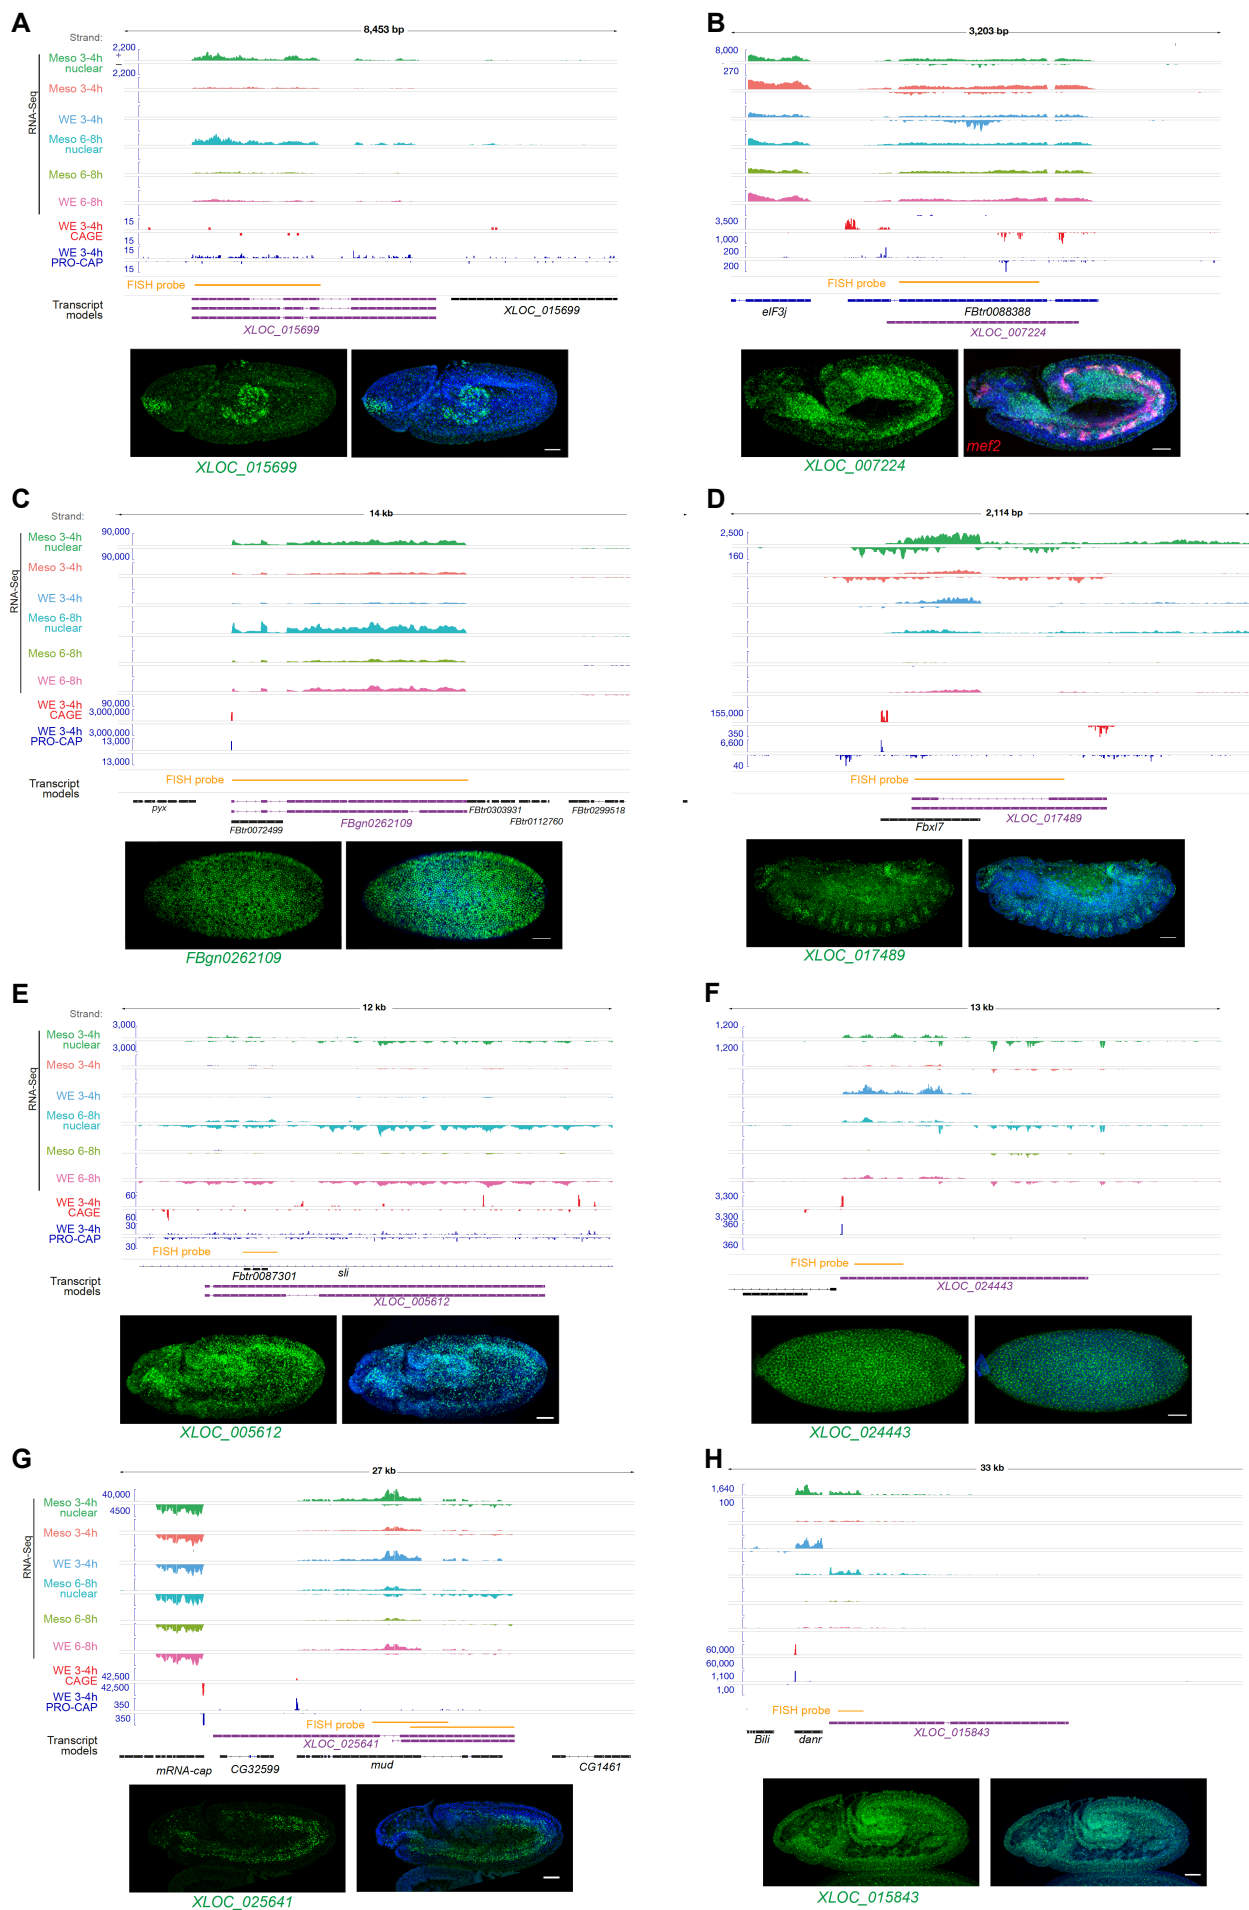

**Figure S6. Temporal and Spatial expression of developmental lncRNAs. Related to Figure 2**  
 (A-H) Above, genomic regions showing the expression of the indicated lncRNA gene (purple gene models) across samples. Meso = FACS purified mesodermal cells, WE = whole embryo, h = hours of embryogenesis. Below, fluorescent in situ hybridization (FISH) images of the lncRNA (green) with DAPI (blue) showing representative expression patterns. *XLOC\_007224* is a double in-situ with a muscle marker (*Mef2*, red) (B). The coordinates and expression of all lncRNAs tested is provided in Table S5.

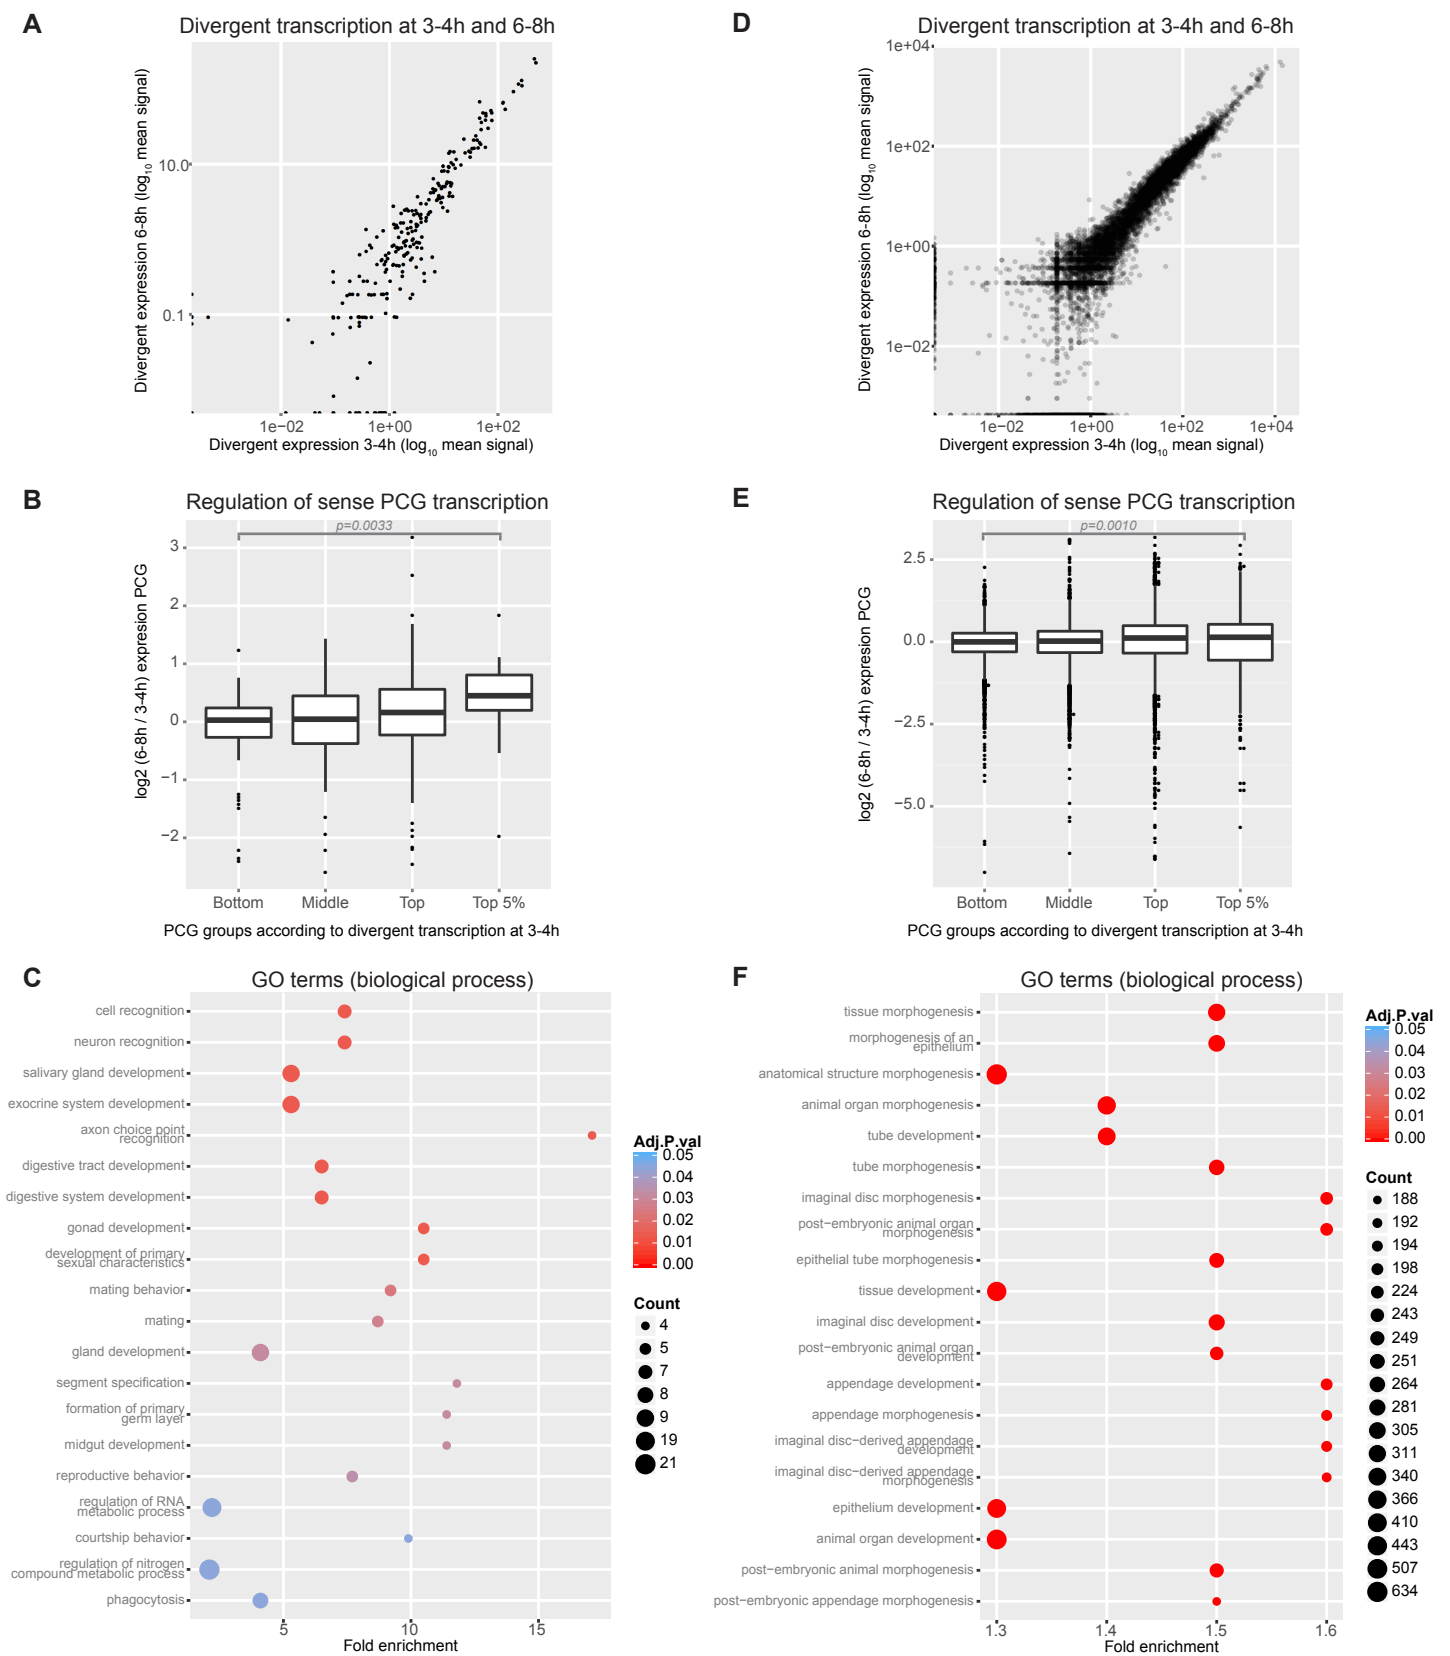

**Figure S7. Analysis of divergent transcriptional units. Related to Figure 3**

(A-C) lncRNA-associated PCG promoters (Figure 3C-D). (D-F) Promoters from all PCG active at mesoderm 3-4h (Figure 3E-F). (A, D) Divergent transcription is stable between 3-4h and 6-8h developmental times, as shown by the high correlation between expression values at both time-points (Pearson's  $r = 0.985$  and  $0.956$  respectively). (B, E) Presence of divergent transcription predicts differential regulation of gene expression across developmental time for the PCG. Boxplots indicate change in expression from 3-4h to 6-8h of the PCGs corresponding to the different 3-4h divergent transcription groups. PCGs were divided in thirds and in addition the highest 5% is shown separately. P-value for Wilcoxon test is indicated. (C, F) Genes harboring divergent transcription (top third) are enriched in developmental functions. GO term enrichment analysis using the corresponding complete PCG set as universe (antisense lncRNA-associated PCG or all expressed in mesoderm at 3-4h).



**Table S1. Overview of the transcriptome sequencing. Related to Figure 1**

Summary of sequenced samples and mapped reads for the total RNA-seq and 5' CAGE analysis of gene expression on the *twi::EGFP-CBP20* line.

| Sample name      | Origin          | Library       | Time point | Mapped reads |
|------------------|-----------------|---------------|------------|--------------|
| 34_Sa            | Mesoderm        | total RNA-seq | 3-4h       | 20121011     |
| 34_Sb            | Mesoderm        | total RNA-seq | 3-4h       | 17504271     |
| 34_Sna           | Mesoderm nuclei | total RNA-seq | 3-4h       | 14580946     |
| 34_Snb           | Mesoderm nuclei | total RNA-seq | 3-4h       | 14883067     |
| 34_Ua            | Whole embryo    | total RNA-seq | 3-4h       | 5055384      |
| 34_Ub            | Whole embryo    | total RNA-seq | 3-4h       | 9050576      |
| 46_Sb            | Mesoderm        | total RNA-seq | 4-6h       | 13402704     |
| 46_Sc            | Mesoderm        | total RNA-seq | 4-6h       | 18569755     |
| 46_Ua            | Whole embryo    | total RNA-seq | 4-6h       | 8769415      |
| 46_Ub            | Whole embryo    | total RNA-seq | 4-6h       | 4181181      |
| 68_Sc            | Mesoderm        | total RNA-seq | 6-8h       | 15781612     |
| 68_Sd            | Mesoderm        | total RNA-seq | 6-8h       | 8877609      |
| 68_Snc           | Mesoderm nuclei | total RNA-seq | 6-8h       | 19991188     |
| 68_Snd           | Mesoderm nuclei | total RNA-seq | 6-8h       | 12754290     |
| 68_Ua            | Whole embryo    | total RNA-seq | 6-8h       | 7058205      |
| 68_Uc            | Whole embryo    | total RNA-seq | 6-8h       | 12176734     |
| 68_Ud            | Whole embryo    | total RNA-seq | 6-8h       | 14744629     |
| CAGE_U60_34h     | Whole embryo    | 5' CAGE       | 3-4h       | 23241554     |
| CAGE_S60_34h     | Mesoderm        | 5' CAGE       | 3-4h       | 15876118     |
| CAGE_U46_46h     | Whole embryo    | 5' CAGE       | 4-6h       | 17738836     |
| CAGE_S46_46h     | Mesoderm        | 5' CAGE       | 4-6h       | 13564260     |
| CAGE_U56_68h     | Whole embryo    | 5' CAGE       | 6-8h       | 12576260     |
| CAGE_S56_68h     | Mesoderm        | 5' CAGE       | 6-8h       | 26555562     |
| CAGE_meso_S13_r1 | Mesoderm        | 5' CAGE       | 6-8h       | 24953370     |
| CAGE_meso_S13_r2 | Mesoderm        | 5' CAGE       | 6-8h       | 17308274     |
| CAGE_meso_S3_r1  | Mesoderm        | 5' CAGE       | 6-8h       | 38534497     |
| CAGE_meso_S3_r2  | Mesoderm        | 5' CAGE       | 6-8h       | 21603091     |

**Table S6. Oligonucleotides used for FISH probe amplification and qPCR. Related to STAR Methods and Key Resources Table**

| <b>Gene</b>   | <b>Application</b>                      | <b>Fw Sequence (5' -&gt; 3')</b> | <b>Rv Sequence (5' -&gt; 3')</b> |
|---------------|-----------------------------------------|----------------------------------|----------------------------------|
| XLOC_010934   | qPCR                                    | GCCTGCAATCGTAAAGGATGG            | TTTCGCACGGCTCTTGTTTC             |
| XLOC_011009   |                                         | AGCAAAAATCGCAGGCACAG             | GCTGCAGCATGGAATTTTCC             |
| XLOC_013478   |                                         | TGGCAGACAACACACTTTCG             | TTATTTCCCAACGGCCCTTG             |
| FBgn0263019   | cDNA<br>amplification<br>for FISH probe | CAAAAACGAGTCAGCGGCAA             | ATGTGACTCCCGCTTTCGTT             |
| FBgn0263595   |                                         | GAAACCGAATGCGAATCCCG             | ACTGGGCCATAAAGCAACCA             |
| FBgn0266236   |                                         | AGTGTCTGAATCACTGGGCG             | TGGCTTTGACATTTGTTCA              |
| FBgn0266631   |                                         | GGAAAAAGGATGCGAATCCGA            | TCCTTGTTCAATCTAAGAGGCA           |
| XLOC_004366   |                                         | GGAAGGTATGGGATGGCCTG             | GACGGATTTTCGGAGTCGACA            |
| XLOC_012225_1 |                                         | GAATCCAAGGAGCGTGGTCA             | TTGCCATTTCCATTGCAGCC             |
| XLOC_012225_2 |                                         | ATGCCCTGAAATCTTGCGGA             | TAACGACGATCCAAGAGGGC             |
| XLOC_012319   |                                         | CCAGCCACGCATTTTGTCAA             | TTGGCAGAGTGGGTGGTTTT             |
| XLOC_018482   |                                         | TAGAGCAGCGGATAAAGCA              | GAAGGACTTATCGGCCGTCG             |

**Table S7. Comparison of our novel lncRNA genes set with the FlyBase r6.21 annotation. Related to STAR Methods**

|                                                                                       | Novel gene model | Transcripts in overlap | Annotated gene | Transcripts in overlap                                                  | Comments                                                                  |
|---------------------------------------------------------------------------------------|------------------|------------------------|----------------|-------------------------------------------------------------------------|---------------------------------------------------------------------------|
| Matching previously annotated transcripts                                             | XLOC_004536      | TCONS_00012691         | CR46064        | FBtr0347293                                                             |                                                                           |
|                                                                                       | XLOC_005255      | TCONS_00014942         | CR45276        | FBtr0345530                                                             | Novel model is longer                                                     |
|                                                                                       | XLOC_007166      | TCONS_00020918         | CR45321        | FBtr0345669                                                             |                                                                           |
|                                                                                       | XLOC_007956      | TCONS_00023809         | CR45270        | FBtr0345480                                                             | Novel model is longer                                                     |
|                                                                                       |                  | TCONS_00023810         |                | FBtr0345792<br>FBtr0345793                                              |                                                                           |
|                                                                                       | XLOC_009721      | TCONS_00028436         | CR46005        | FBtr0347134                                                             | Novel model is longer                                                     |
|                                                                                       |                  | TCONS_00028437         |                | FBtr0347135                                                             |                                                                           |
|                                                                                       |                  | TCONS_00028438         |                |                                                                         |                                                                           |
| TCONS_00028439                                                                        |                  |                        |                |                                                                         |                                                                           |
| XLOC_012319                                                                           | TCONS_00036228   | CR46003                | FBtr0347130    |                                                                         |                                                                           |
|                                                                                       | TCONS_00036229   |                        |                |                                                                         |                                                                           |
|                                                                                       | TCONS_00036230   |                        |                |                                                                         |                                                                           |
|                                                                                       | TCONS_00036231   |                        |                |                                                                         |                                                                           |
|                                                                                       | TCONS_00036232   |                        |                |                                                                         |                                                                           |
| XLOC_015145                                                                           | TCONS_00043859   | CR45631                | FBtr0346325    |                                                                         |                                                                           |
| Previously annotated genes but new models may represent different transcript isoforms | XLOC_013181      | TCONS_00038525         | CR45912        | FBtr0346984                                                             | Novel model reflects more accurately the read coverage                    |
|                                                                                       |                  | TCONS_00038526         |                | FBtr0346985<br>FBtr0346986                                              |                                                                           |
|                                                                                       | XLOC_024457      | TCONS_00066961         | flam           | FBtr0347221                                                             | Overlap at the start region, but novel models include novel exonic region |
|                                                                                       |                  | TCONS_00066962         |                | FBtr0347222                                                             |                                                                           |
|                                                                                       |                  | TCONS_00066963         |                | FBtr0347223                                                             |                                                                           |
|                                                                                       |                  | TCONS_00066964         |                | FBtr0347224                                                             |                                                                           |
|                                                                                       |                  | TCONS_00066965         |                | FBtr0347225                                                             |                                                                           |
|                                                                                       |                  | TCONS_00066966         |                | FBtr0347226<br>FBtr0347227<br>FBtr0347467<br>FBtr0347468<br>FBtr0347469 |                                                                           |
| Different genes than those annotated                                                  | XLOC_000697      | TCONS_00002074         | CR46196        | FBtr0347474                                                             |                                                                           |
|                                                                                       |                  | TCONS_00002075         |                |                                                                         |                                                                           |
|                                                                                       | XLOC_004996      | TCONS_00014060         | CR45309        | FBtr0345583                                                             |                                                                           |
|                                                                                       | XLOC_011009      | TCONS_00031884         | CR46216        | FBtr0347511                                                             |                                                                           |
|                                                                                       | XLOC_013478      | TCONS_00039592         | CR45966        | FBtr0347079                                                             |                                                                           |
|                                                                                       | XLOC_015885      | TCONS_00046343         | CR45651        | FBtr0346368                                                             |                                                                           |
|                                                                                       | XLOC_017217      | TCONS_00050718         | CR46016        | FBtr0347170                                                             |                                                                           |
|                                                                                       | XLOC_018845      | TCONS_00055658         | CR45573        | FBtr0346231                                                             |                                                                           |
| XLOC_023269                                                                           | TCONS_00062804   | CR45519                | FBtr0346055    |                                                                         |                                                                           |
